# Supplementary material for: Rapid reduction of pentavalent antimony by trypanothione: potential relevance to antimonial activationElectronic supplementary information (ESI) available: experimental details. See http://www.rsc.org/suppdata/cc/b2/b210240d/
Source: Royal Society of Chemistry journal article supplement (doi:10.1039/b210240d), 2002-12-18
Supplement: b210240d.doc [file b210240d.doc]

**Chemical Communication Paper no: b210240d**

**Supplementary Materials:**

*Notes and abbreviations:*

amastigote, the parasites were cultured at pH 5 and 310 K to recreate the intracellular form; BPR, bromopyrogallol; pHvalues, for those NMR experiments in D2O, usually pD= pH* + 0.4; promastigote, the parasites were cultured at pH 7.4 and 298 K to model the extracellular stage; T(SH)2, reduced form of trypanothione; T(S-S), oxidized form of trypanothione (disulfide form); TR, trypanothione reductase

*Experimental details:*

UV-vis BPR titration for to determine the SbIII content was carried out on a Varian Cary 50 UV

vis spectrometer. 700 L of 15 M final BPR concentration was used for SbIII detection. S. Rath,

W. F. Jardim, J. G. Dórea, *Fresenius’ J. Anal. Chem.* **1997**, *358*, 548-550.

HPLC was carried out on a Waters 510 HPLC system equipped with a Waters 410 differential

refractometer, using a Nucleosil 100-10 SA cation-exchange column (250 X 20 mm, 100 Å, 10

m) with a 500 L sample volume, using 1 M KNO3 as the eluant. Following the separation, a desalting procedure was performed using a GL-science PREP-ODS reverse phase preparative

column.

1H spectra were recorded on a Bruker AVANCE600 spectrometer. Transmitter presaturation

was used to suppress the residual HOD resonance.

*Leishmania enriettii* were grown at 298 K in *Schneider’s Drosophila* medium (Gibco BRL), pH 6.9, supplemented with 10% heat-inactivated fetal calf serum (Gibco BRL) and 25 g/mL gentamycin (Gibco BRL) (5 X 107 cells per ml). 500 ml of cell culture was harvested, washed with buffer A: 20 mM phosphate buffered saline (pH 7.2) and re-suspended in 2 ml of buffer A at 277 K. The resulting solution was sonicated (5 X 30s pulses with intermittent cooling on ice) followed by centrifugation to remove the cell debris. The supernatant was diluted to 20% with buffer A.
